# Supplementary material
Source: ML conference proceedings conference paper supplement (https://proceedings.neurips.cc/paper_files/paper/2020/hash/bdbca288fee7f92f2bfa9f7012727740-Abstract.html)
Supplement: Supplementary file [file bdbca288fee7f92f2bfa9f7012727740-Supplemental.zip]

# Appendices

## A Code for the 2-sines and target distributions

```
1 import numpy as np
3 def get_data_batch(bsz, dist):
4     # bsz: batch size
5
6     rng = np.random.RandomState()
7
8     if dist == "2-sines":
9         x = (rng.rand(bsz) - 0.5) * 2 * np.pi
10        u = (rng.binomial(1, 0.5, bsz) - 0.5) * 2
11        y = u * np.sin(x) * 2.5
12
13    elif dist == "target":
14        shapes = np.random.randint(7, size=bsz)
15        mask = []
16        for i in range(7):
17            mask.append((shapes==i) * 1.) # boolean to float
18
19        theta = np.linspace(0, 2 * np.pi, bsz, endpoint=False)
20
21        x = (mask[0] + mask[1] + mask[2]) * (rng.rand(bsz) - 0.5) * 4 + \
22            (-mask[3] + 0 * mask[4] + mask[5]) * 2 * np.ones(bsz) + \
23            mask[6] * np.cos(theta)
24
25        y = (-mask[0] + 0 * mask[1] + mask[2]) * 2 * np.ones(bsz) + \
26            (mask[3] + mask[4] + mask[5]) * (rng.rand(bsz) - 0.5) * 4 + \
27            mask[6] * np.sin(theta)
28
29    return np.stack((x, y), 1)
```

## B Examples of generated point clouds

### B.1 Reconstruction of seen data

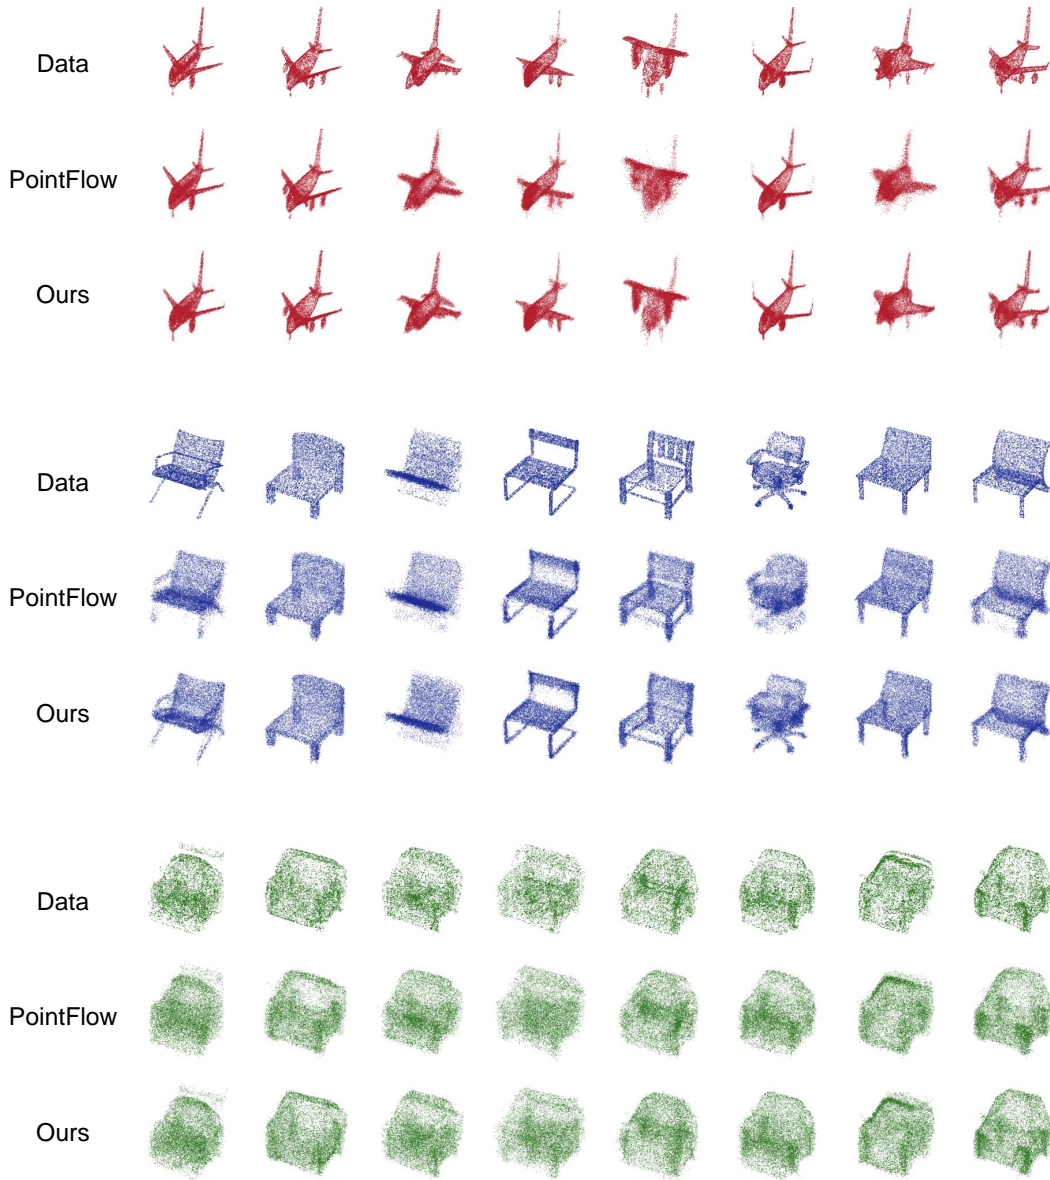

Figure 1: Reconstructed point clouds of seen data.

## B.2 Reconstruction of unseen data

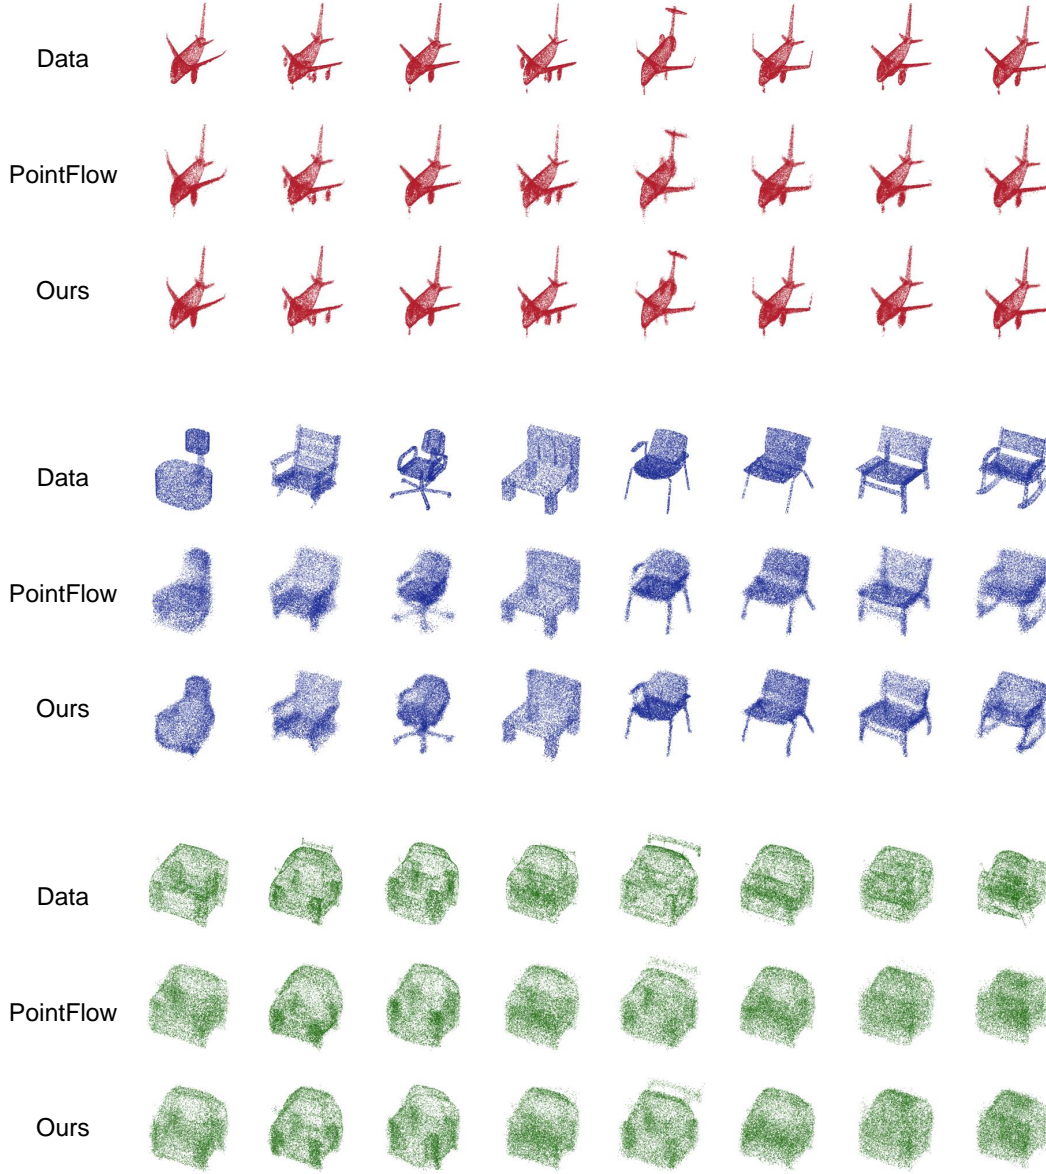

Figure 2: Reconstructed point clouds of unseen data.

### B.3 Generation

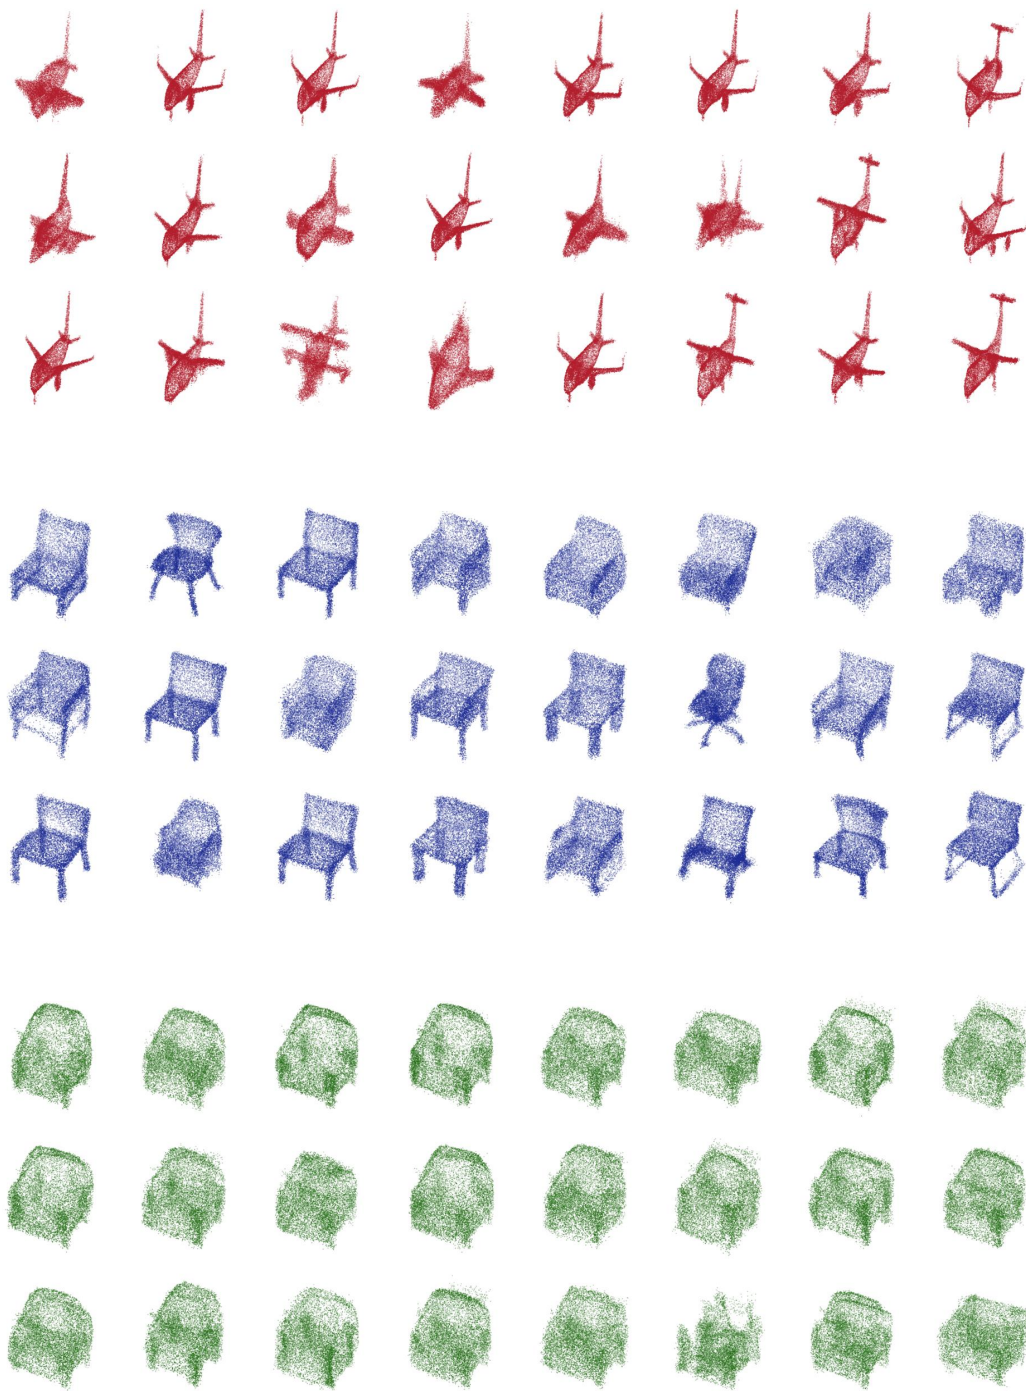

Figure 3: Synthetic point clouds generated by SoftPointFlow.

## C Point clouds generated by PointFlow and SoftPointFlow (original ratio)

### C.1 Reconstruction of seen data

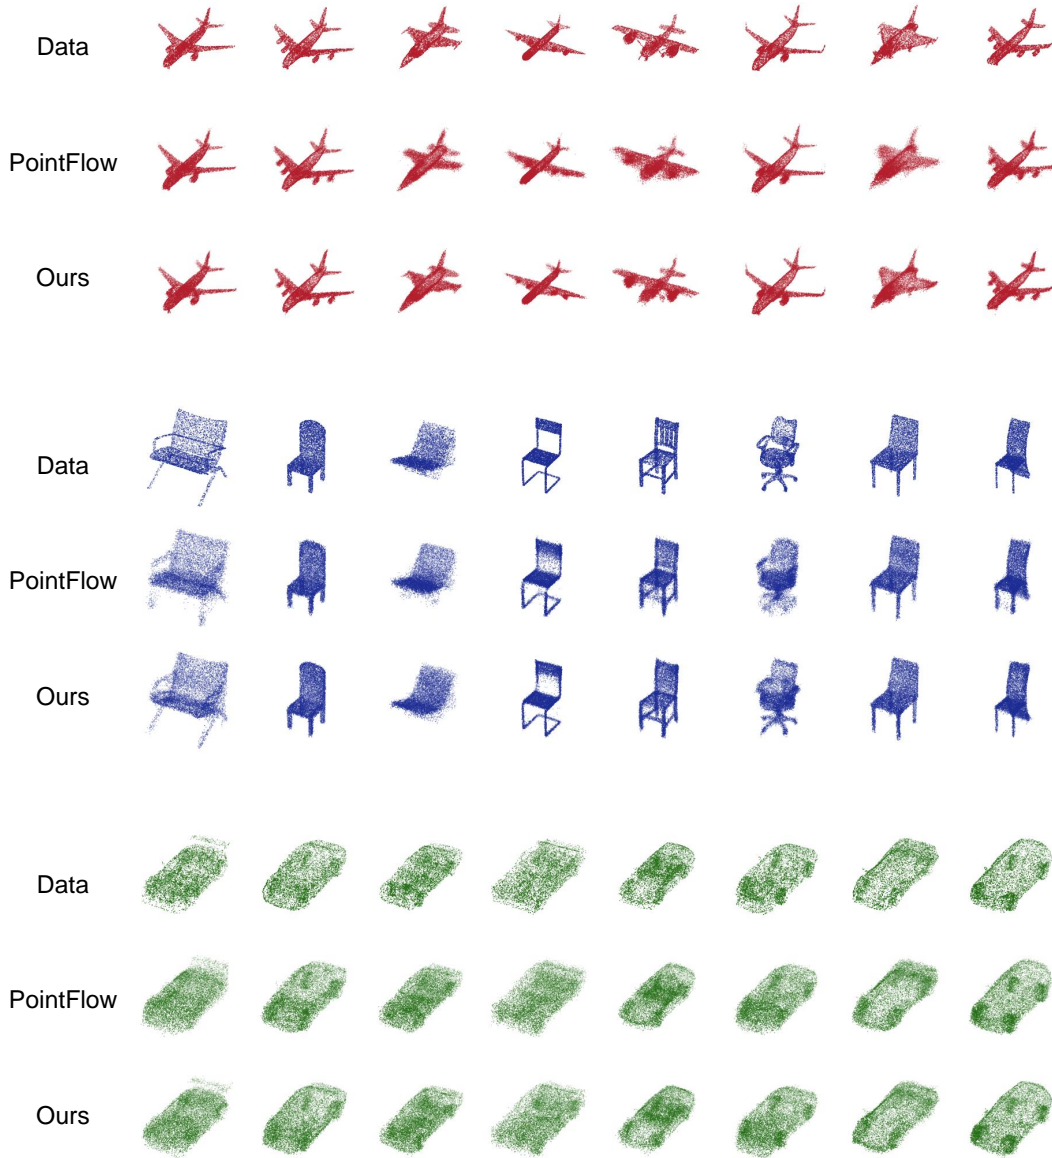

Figure 4: Reconstructed point clouds of seen data.



## C.2 Reconstruction of unseen data

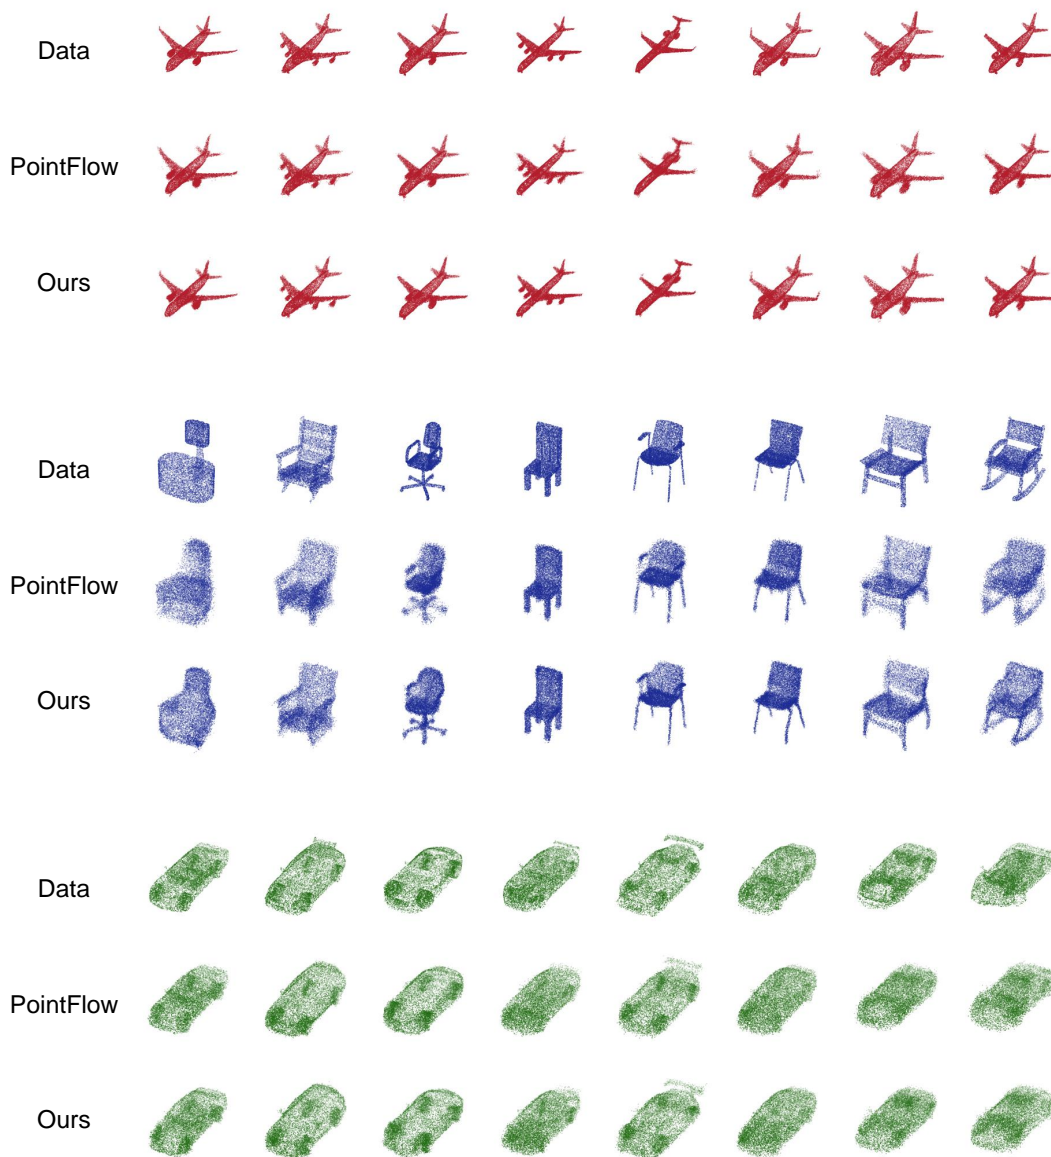

Figure 5: Reconstructed point clouds of unseen data.

### C.3 Generation

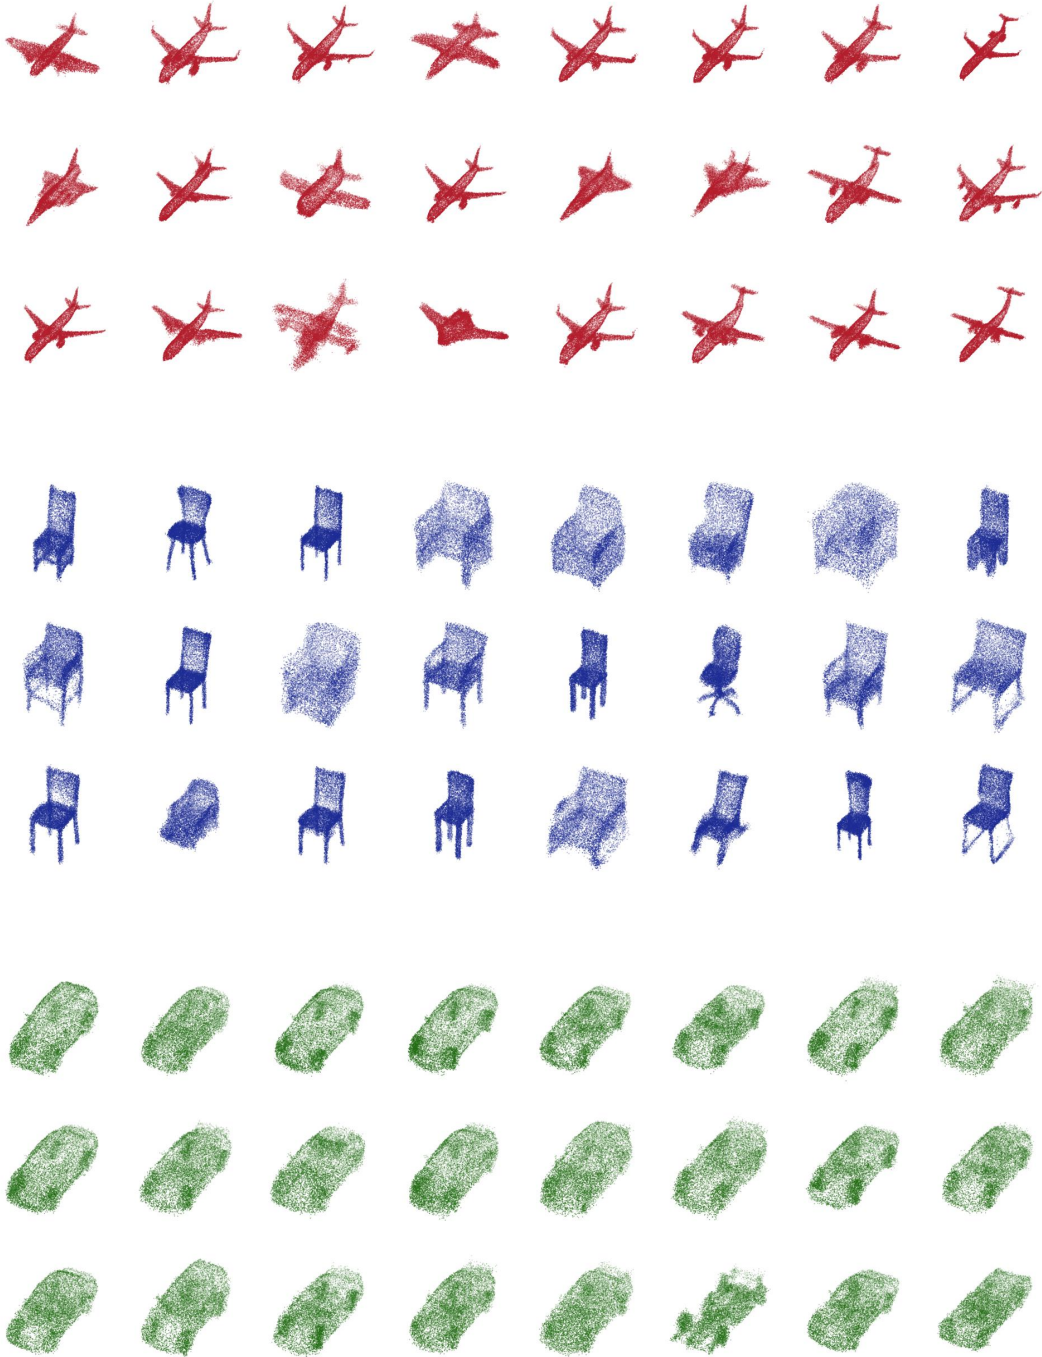

Figure 6: Synthetic point clouds generated by SoftPointFlow.
