# Supplementary material
Source: ML conference proceedings conference paper supplement (https://proceedings.neurips.cc/paper_files/paper/2020/hash/bdbca288fee7f92f2bfa9f7012727740-Abstract.html)

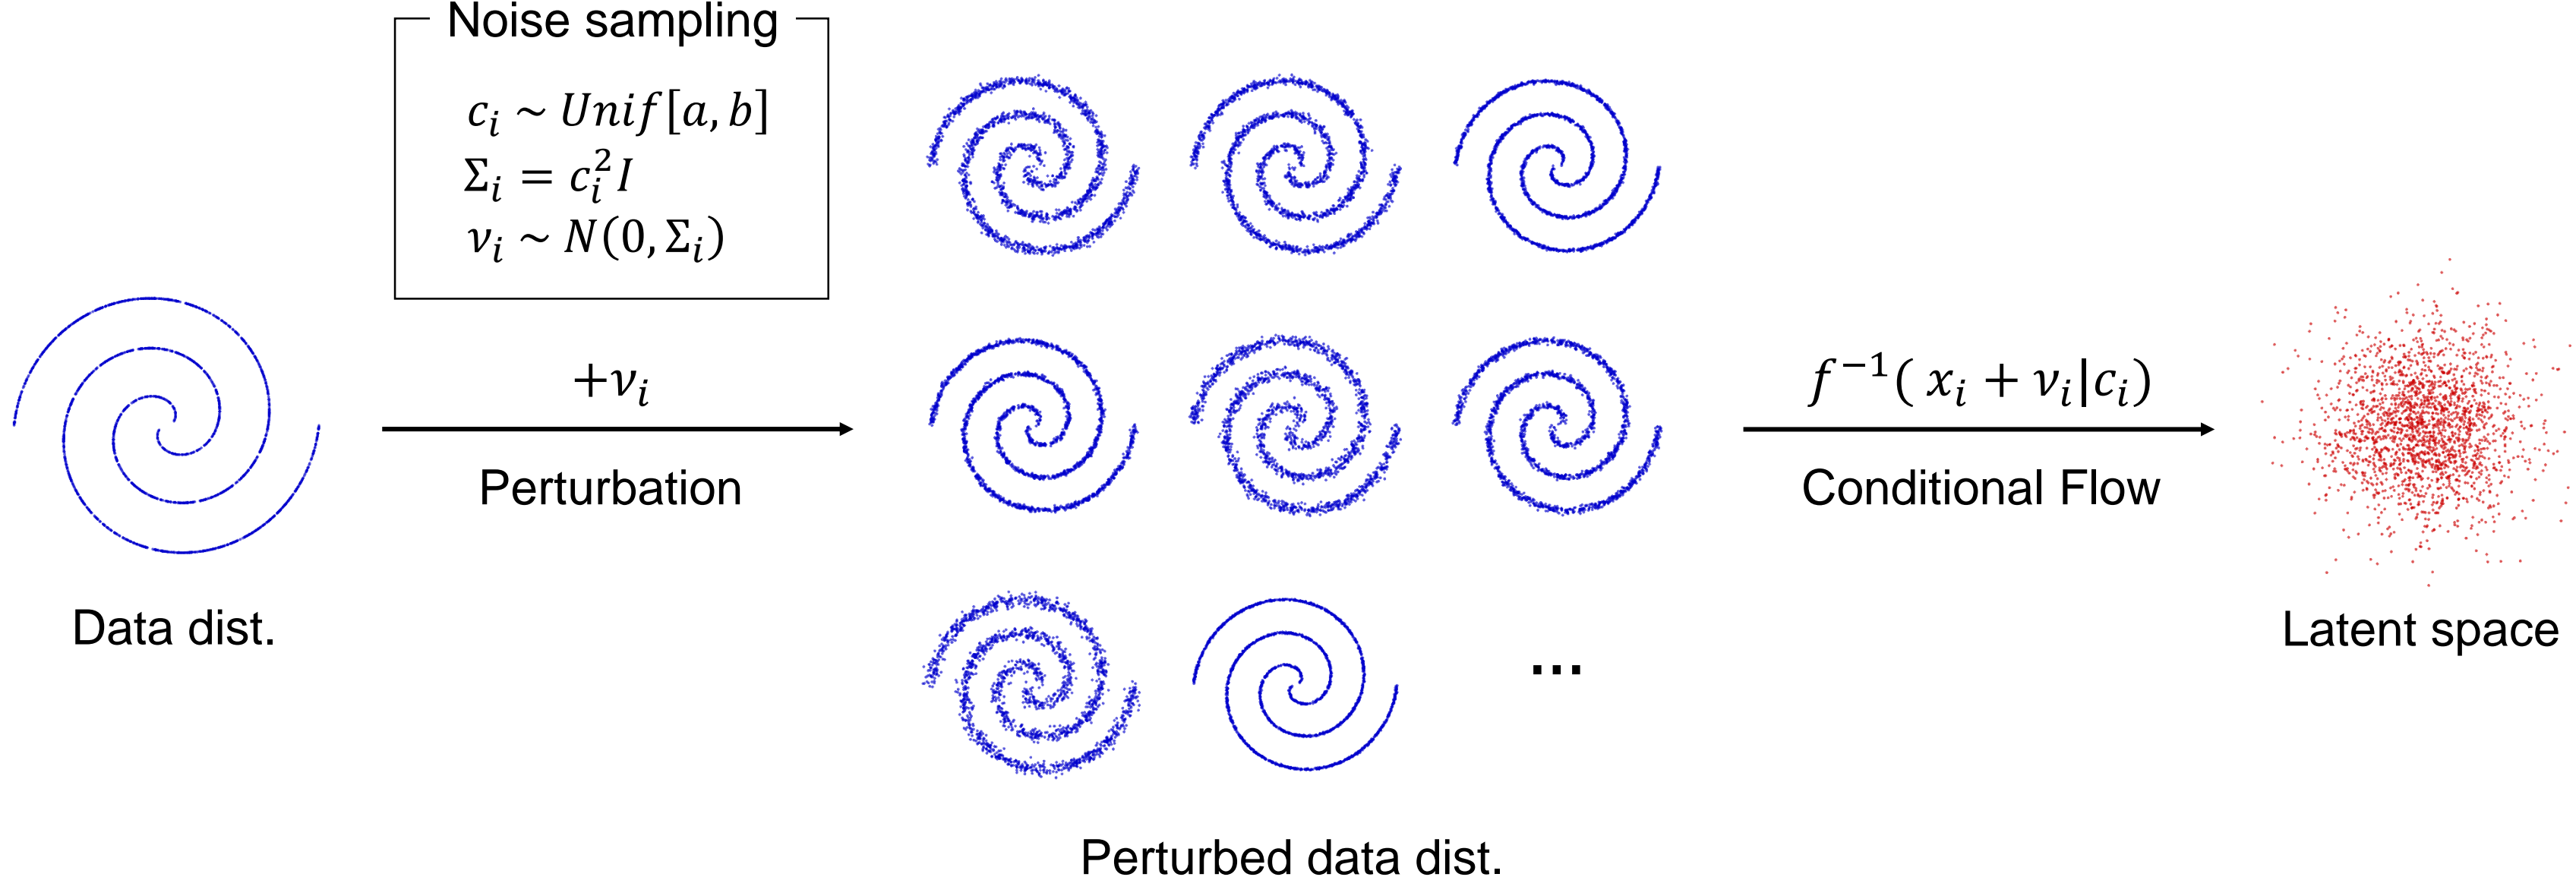

Supplement: Supplementary file [file bdbca288fee7f92f2bfa9f7012727740-Supplemental.zip]
